# Supplementary material for: Loss of succinate dehydrogenase activity results in dependency on pyruvate carboxylation for cellular anabolism
Source: Nat Commun. 2015 Nov 2;6:8784. doi: 10.1038/ncomms9784 (PMC4632646; doi:10.1038/ncomms9784)
Supplement: Supplementary Information — Supplementary Figures 1-4 and Supplementary Table 2 [file ncomms9784-s1.pdf]

## **Loss of succinate dehydrogenase activity results in dependency on pyruvate carboxylation for cellular anabolism**

Charlotte Lussey-Lepoutre, Kate ER Hollinshead, Christian Ludwig, Mélanie Menara, Aurélie Morin, Luis-Jaime Castro-Vega, Seth J Parker, Maxime Janin, Cosimo Martinelli, Chris Ottolenghi, Christian Metallo, Anne-Paule Gimenez-Roqueplo, Judith Favier and Daniel A Tennant.

### **List of supplementary Figures and Tables**

- Supplementary Figure 1
- Supplementary Figure 2
- Supplementary Figure 3
- Supplementary Figure 4
- Supplementary Table 1 (see data sheet)
- Supplementary Table 2

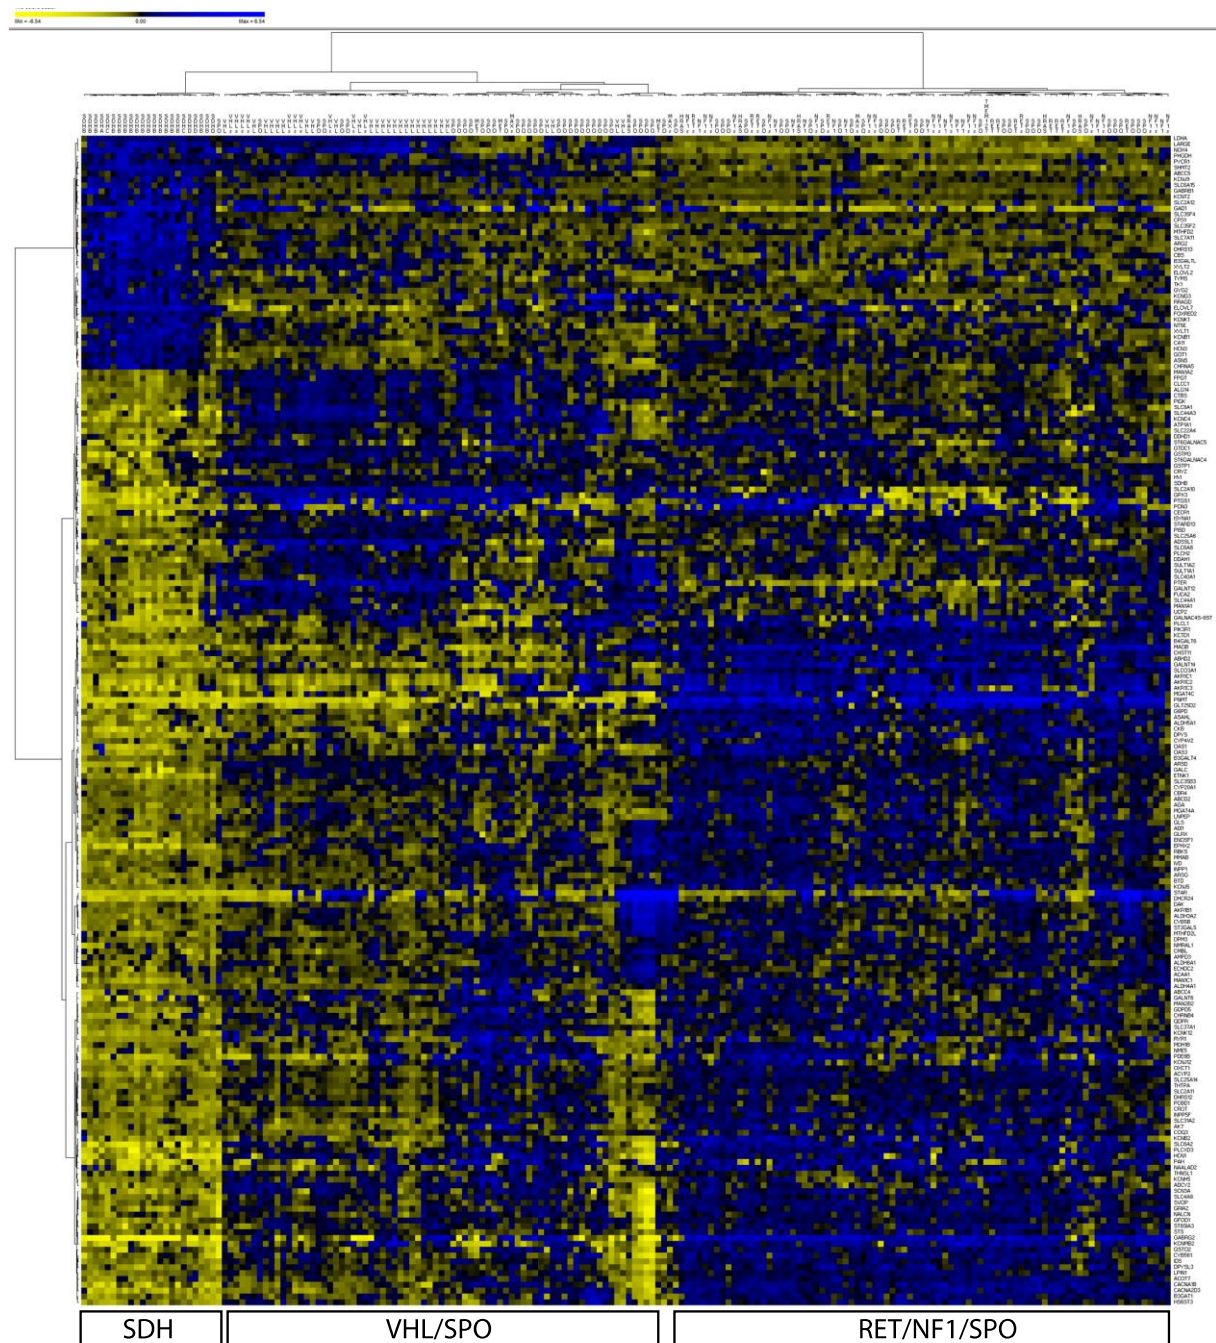

**Supplementary Figure 1: Transcriptome of cancer-associated metabolic genes shows altered metabolic profile of SDH-mutated tumours.** Gene expression data from 186 PCC/PGL that were profiled on the HG-U133 Plus 2.0 Affymetrix GeneChip were evaluated for a list of 2556 genes that encode for metabolic enzymes and transporters, adapted from the list reported by Possemato *et al.* 581 genes were differentially expressed (adjusted p value <0.01; Bonferroni multiple test comparisons): 300 upregulated and 281 downregulated in SDH-mutated tumours vs SDH WT mutated tumours. Heatmap shows classification using the 200 differentially expressed genes (40 upregulated and 160 downregulated) with a fold change >1.7.

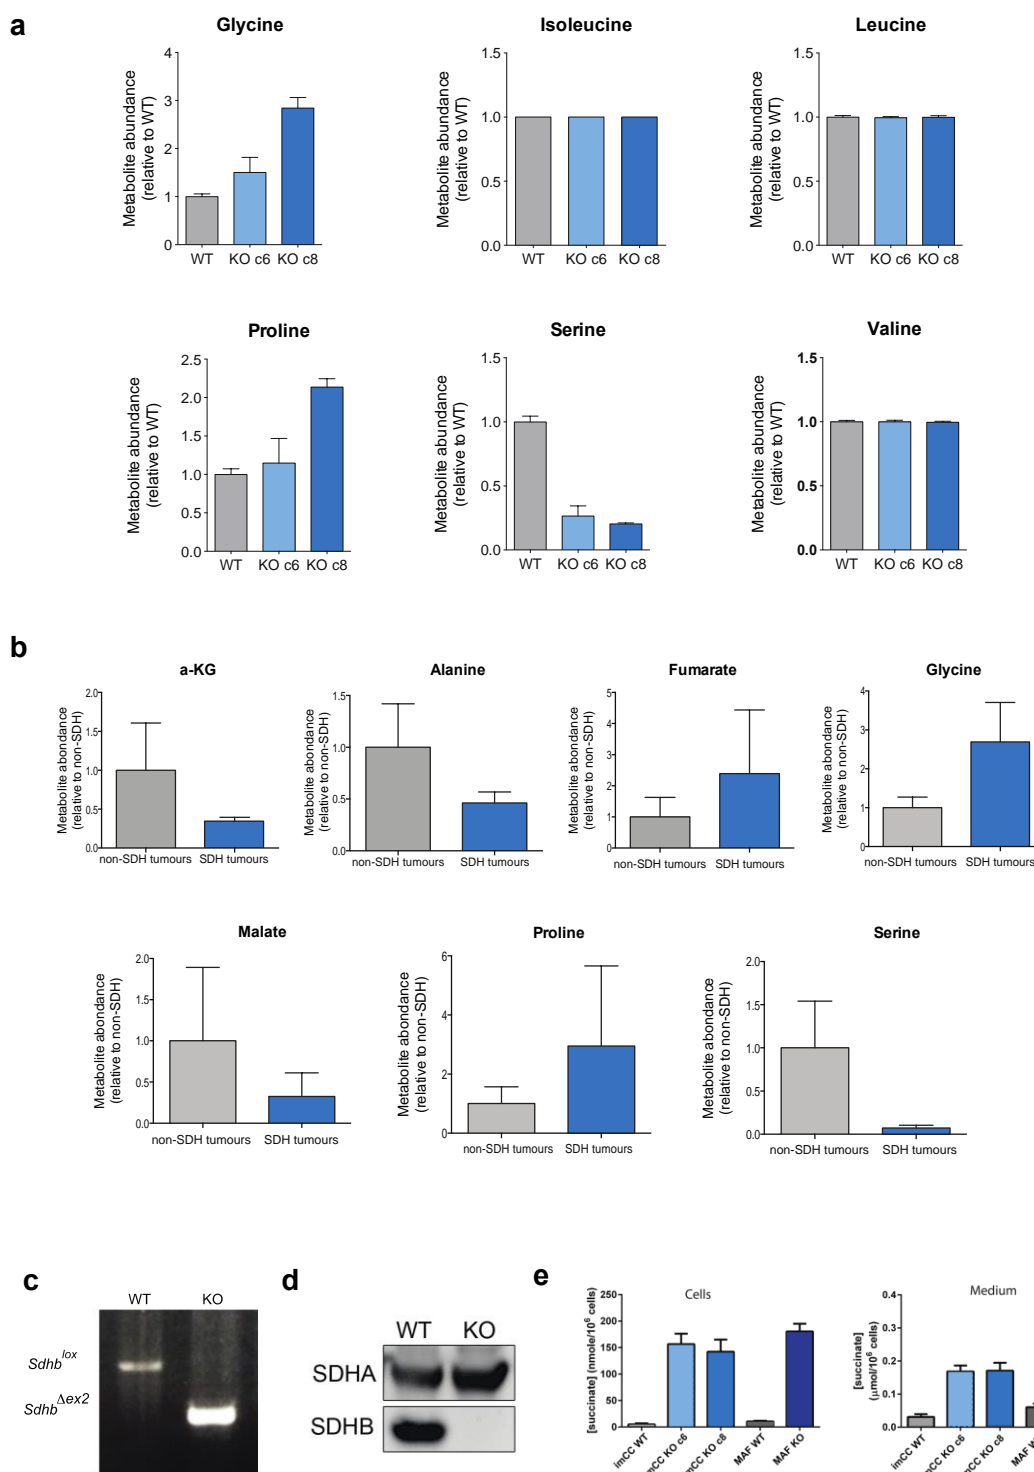

**Supplementary Figure 2**

**a**) Abundance of glycine, isoleucine leucine, proline, serine and valine in imCC *Sdhb*-null (KO c6 and c8) cells relative to wild-type (WT) control, as assessed using GC-MS (n=3, mean  $\pm$  SD). Serine is significantly decreased, while glycine and proline are increased, only in clone 8 **b**) Steady-state  $\alpha$ KG, alanine, fumarate, glycine, malate, proline and serine in SDH-mutated patient tumours (n=3) compared to SDH WT tumours (n=3). Data are mean  $\pm$  SD. As in KO cells, serine is significantly decreased, in SDH-mutated tumours. Data are mean $\pm$ -SD **c**) genotyping of the mouse adrenal fibroblast *Sdhb* knockout cell line (MAF KO) shows homozygous deletion of *Sdhb* exon 2 ( $\Delta$ ex2) resulting in **d**) complete loss of SDHB protein expression. **e**) Steady-state concentrations of succinate are increased in cells and in the medium from SDH-deficient imCC and MAF (n=3, mean  $\pm$  SD).

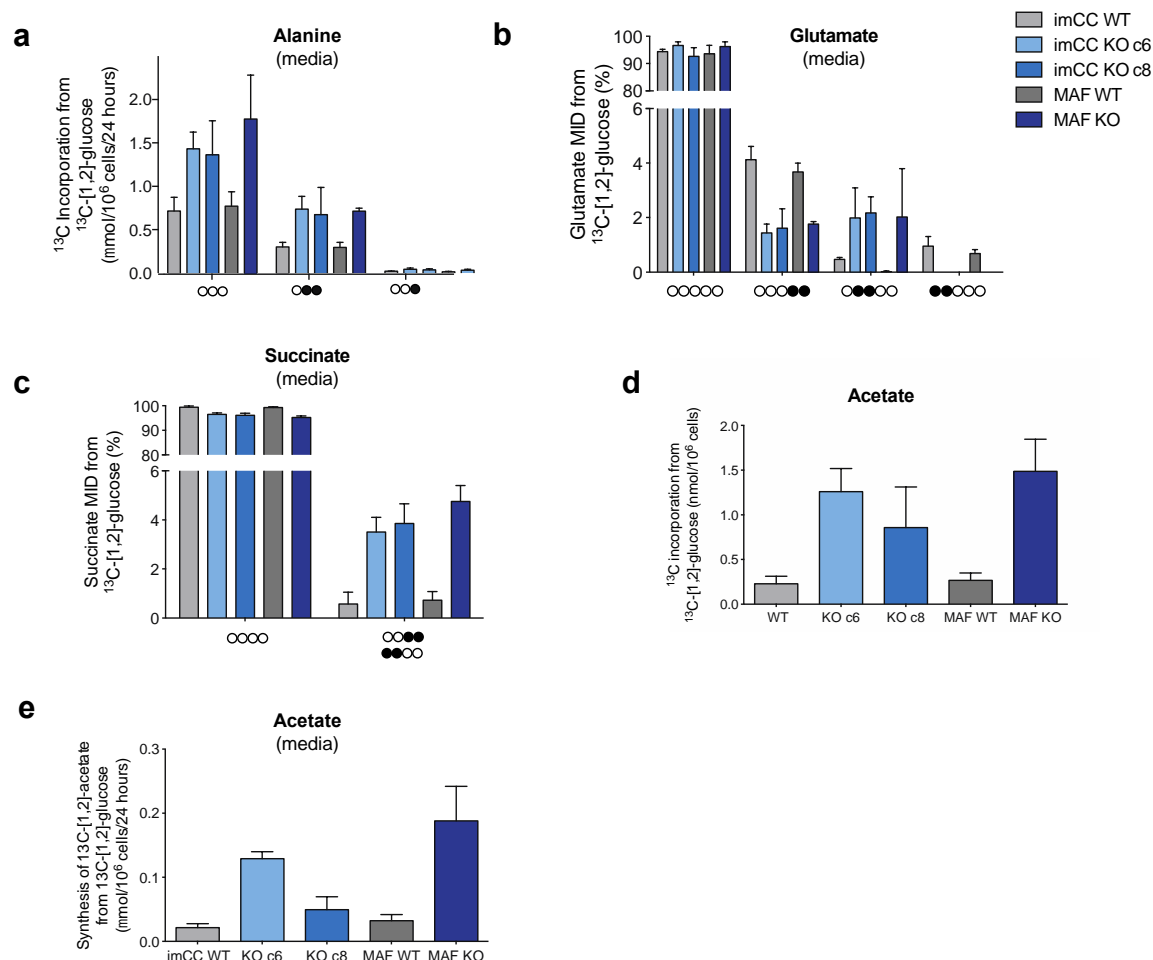

### Supplementary Figure 3

**a)** SDH-deficient imCC and MAF exhibit increased alanine production and excretion. After 24h of incubation with medium containing  $^{13}\text{C}$ -[1,2]-glucose, media was extracted and the abundance of different mass isotopomers of alanine excreted were quantified using NMR spectroscopy.  $^{13}\text{C}$  atoms (arising from glucose) are shown as filled circles, while  $^{12}\text{C}$  atoms are empty circles. Incorporation of  $^{13}\text{C}$  into **b)** glutamate and **c)** succinate. Reduction in the relative abundance of the  $^{13}\text{C}$ -[4,5]-glutamate and increase in  $^{13}\text{C}$ -[2,3]-glutamate isotopomers suggests increase in PC activity and relative decrease in PDH activity in SDH-deficient cells.  $^{13}\text{C}$  atoms are shown as filled circles, while  $^{12}\text{C}$  atoms are empty circles. MID: mass isotopomer distribution. **d-e)** SDH-deficient cells produce and excrete significantly more acetate from glucose than wild-type cells. n=3 replicates, data indicate mean  $\pm$  SD.

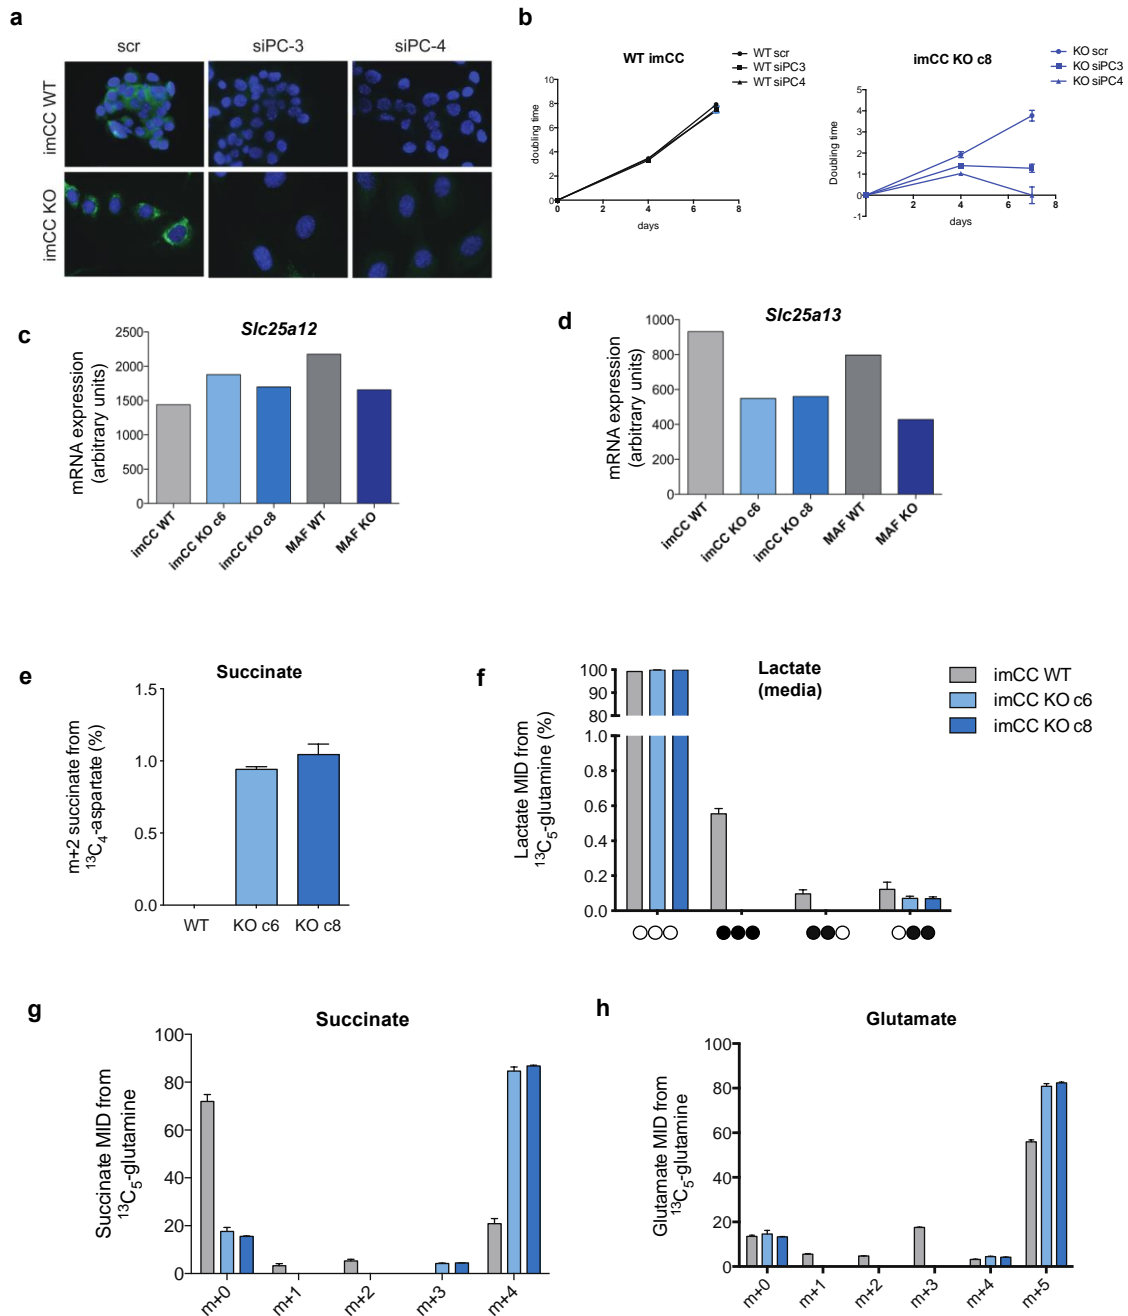

**Supplementary Figure 4**

**a)** Reduction in the expression of PC using siPC sequences #3 and #4 results **b)** in a significant reduction doubling time calculated over 7 days in SDH-deficient cells (right panel) while proliferation of wild-type cells (left panel) is unaffected. Data are mean  $\pm$  SEM (n=3). mRNA expression of **c)** *Slc25a12* and **d)** *Slc25a13* evaluated by microarray in WT and SDH-deficient cells **e)** Amount of m+2 label (%) from  $^{13}\text{C}_4$ -aspartate incorporated into succinate was measured using GC-MS (n=3, data are mean  $\pm$  SD). **f)** Mass isotopomer distribution (MID) of lactate in media after incubation of cells with  $^{13}\text{C}_5$ -glutamine suggest incorporation of carbons into lactate from reductive metabolism in SDH-deficient cells. As the  $^{13}\text{C}$ -[1,2]-lactate and  $^{13}\text{C}$ -[2,3]-lactate isotopologues are made in equal ratios through the action of oxidative TCA cycle metabolism in wild-type cells, the  $^{13}\text{C}$ -[2,3]-lactate isotopomer in these cells is an over-estimation of reductive carbon incorporation (n=3, data are mean  $\pm$  SD). **g-h)** MID of intracellular succinate and glutamate after cells were incubated for 72 hours with  $^{13}\text{C}_5$ -glutamine as measured using GC-MS (n=3, data are mean  $\pm$  SD).

### **Legend to Supplementary Table 1- Transcriptome data.**

Data sheet shows **a)** metabolism-related genes upregulated in SDH-mutated PCC/PGL while **b)** metabolism-related genes downregulated in SDH-mutated PCC/PGL. Data sheet **c)** Gene ontology analysis of differentially regulated pathways in SDH-mutated PCC/PGL and the corresponding schematic illustration is shown in **d)**. Data sheet **e)** shows the expression of the same genes in mouse imCC and MAF, knockout for *Sdhb* or wild-type (WT). SPO:sporadic.

**Supplementary Table 2- Immunohistochemical evaluation of PC and SLC25A13 levels in human PGL/PCC.**

| Tumour ID | Mutation       | Tumour site | IHC score |          |
|-----------|----------------|-------------|-----------|----------|
|           |                |             | PC        | SLC25A13 |
| CIT_200   | <i>SDHB</i>    | LA          | 0.5       | 3        |
| CIT_208   | <i>SDHB</i>    | Meta        | 1         | 2        |
| CIT_209   | <i>SDHB</i>    | Meta        | NA        | 2.5      |
| PGL1      | <i>SDHB</i>    | Meta        | NA        | 2        |
| PGL2      | <i>SDHB</i>    | APG         | 2         | 2        |
| CIT_201   | <i>SDHB</i>    | APG         | 1         | 3        |
| PGL3      | <i>SDHB</i>    | RA          | 2         | 3        |
| CIT_207   | <i>SDHC</i>    | TPG         | 1         | 2        |
| CIT_158   | <i>SDHD</i>    | APG         | 1.5       | 3        |
| PGL4      | <i>SDHD</i>    | CPG         | 1.5       | 2.5      |
| CIT_048   | <i>SDHD</i>    | TPG         | 2         | 3        |
| PGL5      | <i>SDHD</i>    | CPG         | 2         | 3        |
| CIT_028   | <i>SDHB</i>    | LA          | 2         | 3        |
| PGL6      | <i>SDHD</i>    | APG         | 2         | 3        |
| PGL7      | <i>SDHC</i>    | PGL         | 1.5       | 2        |
| PGL8      | <i>SDHD</i>    | CPG         | NA        | 3        |
| CIT_041   | <i>RETs</i>    | RA          | 0         | 0        |
| CIT_044   | <i>RET</i>     | LA          | 0.5       | 2        |
| CIT_086   | <i>NF1</i>     | LA          | 0.5       | 1        |
| PGL9      | <i>RET</i>     | RA          | 0         | 0        |
| CIT_070   | <i>RETs</i>    | LA          | 0.5       | 1        |
| CIT_061   | <i>NF1s</i>    | LA          | 0         | 1        |
| CIT_016   | <i>NF1</i>     | RA          | 0         | 2        |
| CIT_115   | <i>NF1</i>     | LA          | 0.5       | 0        |
| PGL10     | <i>NF1s</i>    | LA          | 0         | 1        |
| CIT_034   | <i>TMEM127</i> | RA          | NA        | 1        |
| CIT_133   | <i>RET</i>     | LA          | 0         | 1        |

LA: Left adrenal; RA: Right adrenal; TPG: Thoracic paraganglioma; CPG: Cervical paraganglioma; APG: Abdominal paraganglioma; PC: pyruvate carboxylase; IHC: immunohistochemistry
